# Supplementary material
Source: PubMed Central journal article supplement (PMC8043127)
Supplement: ehp7404.smcontents.508.pdf [file ehp7404.smcontents.508.pdf]

**Note to readers with disabilities:** *EHP* strives to ensure that all journal content is accessible to all readers. However, some figures and Supplemental Material published in *EHP* articles may not conform to [508 standards](#) due to the complexity of the information being presented. If you need assistance accessing journal content, please contact [ehp508@niehs.nih.gov](mailto:ehp508@niehs.nih.gov). Our staff will work with you to assess and meet your accessibility needs within 3 working days.

### **Supplemental Material**

#### **Fluoride in Drinking Water, Diet, and Urine in Relation to Bone Mineral Density and Fracture Incidence in Postmenopausal Women**

Emilie Helte, Carolina Donat Vargas, Maria Kippler, Alicja Wolk, Karl Michaëlsson, and Agneta Åkesson

#### **Table of Contents**

**Table S1.** Cross-sectional mean differences in BMD ( $\beta$  coefficients (95% CI), g/cm<sup>2</sup>) across tertiles of urinary fluoride (mg/g creatinine) and dietary fluoride (mg/d) with BMD at the lumbar spine and femoral neck among women with approximately constant drinking water fluoride concentrations from 1982 to baseline.

**Table S2.** Hazard ratios of osteoporotic fractures, excluding vertebral fractures, and corresponding 95% confidence intervals by tertiles of urinary fluoride (mg/g creatinine) and dietary fluoride (mg/d).

**Table S3.** Multivariable adjusted hazard ratios of total, osteoporotic and hip fractures and corresponding 95% confidence intervals by tertiles of urinary fluoride (mg/g creatinine) and dietary fluoride (mg/d), respectively. Multivariable models are further adjusted for baseline bone mineral density (BMD).

**Table S4.** Cross-sectional mean differences in BMD ( $\beta$  coefficients (95% CI), g/cm<sup>2</sup>) across tertiles of urinary fluoride (mg/g creatinine) and dietary fluoride (mg/d) with BMD at the lumbar spine and femoral neck, among women of the Swedish Mammography Cohort – Clinical, including individuals excluded from main analysis because of missing bone mineral density data on either hip or spine.

**Table S5.** Hazard ratios of total, osteoporotic and hip fractures and corresponding 95% confidence intervals by tertiles of urinary fluoride (mg/g creatinine) and dietary fluoride (mg/d), respectively, among women of the Swedish Mammography Cohort – Clinical, including individuals excluded from main analysis because of missing bone mineral density data on either hip or spine.

**Table S6.** Cross-sectional mean differences in Bone mineral density (BMD)( $\beta$  coefficients (95% CI),  $\text{g}/\text{cm}^2$ ) across tertiles of urinary fluoride ( $\text{mg}/\text{g}$  creatinine) with BMD at the lumbar spine and femoral neck among women of the Swedish Mammography Cohort – Clinical with complete exposure data.

**Table S7.** Hazard ratios of total, osteoporotic and hip fractures and corresponding 95% confidence intervals by tertiles of urinary fluoride ( $\text{mg}/\text{g}$  creatinine) among women of the Swedish Mammography Cohort – Clinical with complete exposure data.

**Table S8.** Cross-sectional mean differences in Bone mineral density (BMD)( $\beta$  coefficients (95% CI),  $\text{g}/\text{cm}^2$ ) across tertiles of urinary fluoride ( $\text{mg}/\text{g}$  creatinine) with BMD at the lumbar spine and femoral neck among women of the Swedish Mammography Cohort – Clinical with urinary creatinine concentrations ranging between 0.3  $\text{g}/\text{L}$  and 3.0  $\text{g}/\text{L}$ .

**Table S9.** Hazard ratios of total, osteoporotic and hip fractures and corresponding 95% confidence intervals by tertiles of urinary fluoride ( $\text{mg}/\text{g}$  creatinine) among women of the Swedish Mammography Cohort – Clinical with urinary creatinine concentrations ranging between 0.3  $\text{g}/\text{L}$  and 3.0  $\text{g}/\text{L}$ .
